# Supplementary material for: Evidence for the involvement of the Arabidopsis SEC24A in male transmission
Source: PubMed Central journal article supplement — J Exp Bot. 2011 Jun 24;62(14):4917–26. doi: 10.1093/jxb/err174 (PMC3193003; doi:10.1093/jxb/err174), 2011-06-24
Supplement: supp_err174_00063594-file001.pdf [file supp_err174_00063594-file001.pdf]

## SUPPLEMENTAL MATERIALS

**Manuscript title:** Evidence for the involvement of the Arabidopsis

SEC24A in pollen germination

**Authors:** Renata Conger, Yani Chen, Silvia Fornaciari, Carmen Faso, Michael Held, Luciana Renna and Federica Brandizzi

| Primer            | Sequence (5'-3')        |
|-------------------|-------------------------|
| GABI_172F03<br>RP | GACCTGCAAGAGTTTGAGGTG   |
| GABI_172F03<br>LP | ACTTGGTGGTTCTCCAATTCC   |
| GABIo8409         | ATATTGACCATCATACTCATTGC |

**Supplemental Table 1.** List of primers used in the work.

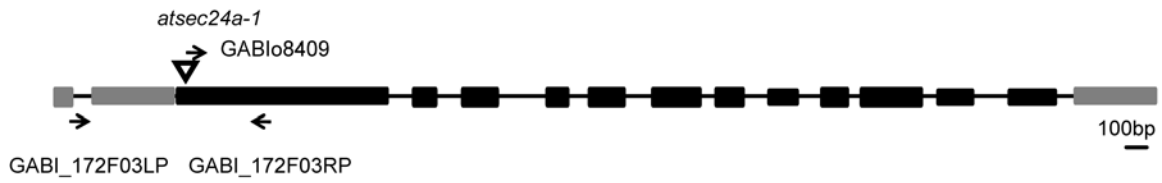

**Supplemental Figure 1. Schematic of the *AtSEC24A* genomic fragment.**

Exons and introns are shown as black boxes and lines, respectively. Sites of the T-DNA insertion and annealing positions of primers are also indicated in the figure.

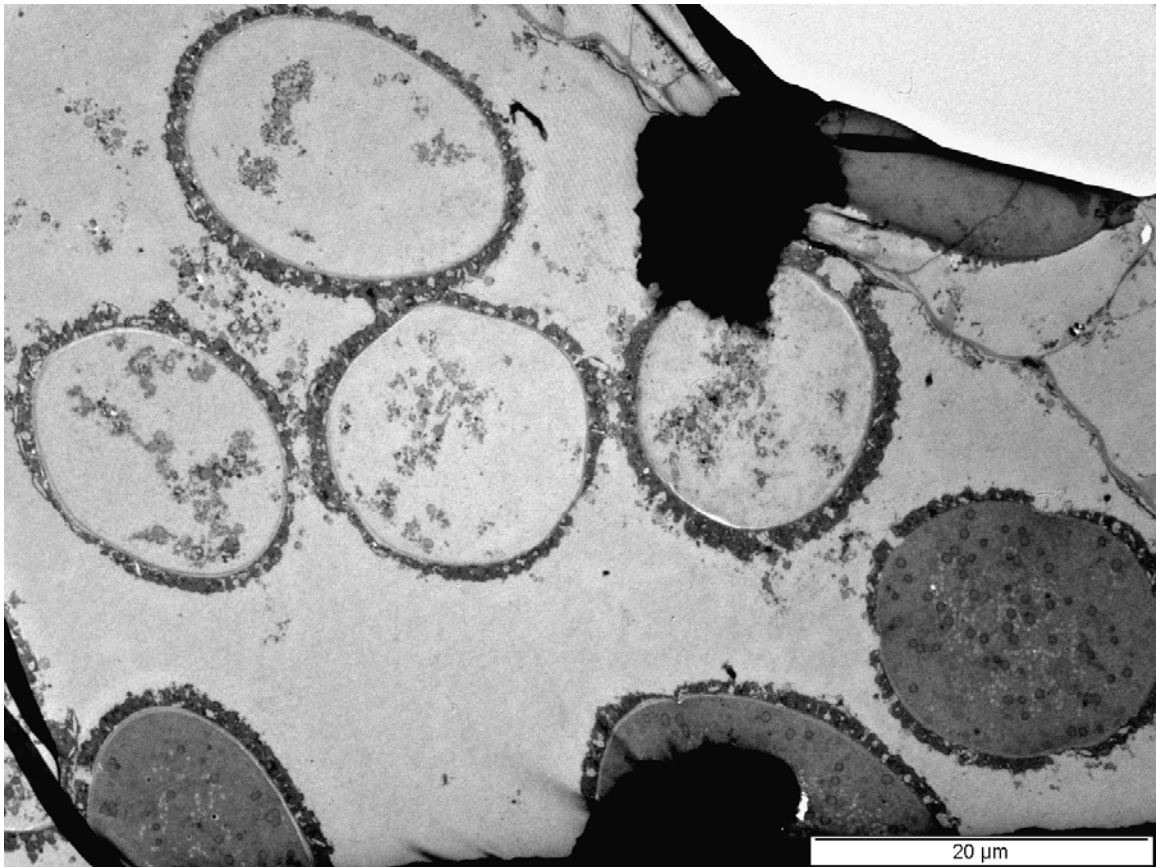

**Supplemental Figure 2. The appearance of the pollen of *atsec24a-1(+/-)* is not homogeneous at an ultrastructural level.**

Transmission electron micrograph of pollen grains from *atsec24a-1(+/-)* anthers showing that although the shape and the size of the pollen grains is uniform, the appearance of the content of the grains varies with half of the grains being more electron translucent than the others. Scale bar = 20 μm.
